# Supplementary material for: Organocatalyzed atom transfer radical polymerization (ATRP) using triarylsulfonium hexafluorophosphate salt (THS) as a photocatalyst
Source: Royal Society of Chemistry journal article supplement (doi:10.1039/c9py01742a), 2020-01-01
Supplement: c9py01742a1.pdf [file c9py01742a1.pdf]

## Supporting Information

### Organocatalyzed Atom Transfer Radical Polymerization (ATRP) using Triarylsulfonium Hexafluorophosphate Salt (THS) as a Photocatalyst

Mengmeng Li, Sixuan Wang, Feifei Li, Lin Zhou, Lin Lei \*

Key Laboratory of Synthetic and Natural Functional Molecular Chemistry of the Ministry of Education, College of Chemistry and Materials Science/Shaanxi Provincial Key Laboratory of Electroanalytical Chemistry, Northwest University, Xi'an, 710127, P. R. China.

Corresponding Author: [leil@nwu.edu.cn](mailto:leil@nwu.edu.cn)

#### Contents

#### **Figures**

- Figure S1:** UV-vis absorption spectra of THS irradiated with LED@365 nm at different times. Page 2
- Figure S2:** The picture of LED-light (365 nm, 5 x 1 w bulb, 480 mW/cm<sup>2</sup>). Page 2
- Figure S3:** Under LED irradiation, molecular rearrangement of the triarylsulfonium moiety resulted in the generation of free H<sup>+</sup>.<sup>1</sup> Page 3
- Figure S4:** Plot of ln ([M]<sub>0</sub> / [M]) vs time. (b) The number-average molecular weight ( $M_{n,GPC}$ ) and polydispersity indices (PDI) versus monomer conversion. Polymerization conditions: [MMA]: [EBiB]: [THS] = 100:1:1, containing 0.25 g methyl methacrylate and 0.75 g solvent ( $V_{DMAC}: V_{THF} = 3:1$ ). Page 3
- Figure S5 :** XPS analysis of Si-Br (a) and Si-PMMA-Br (b). Page 4

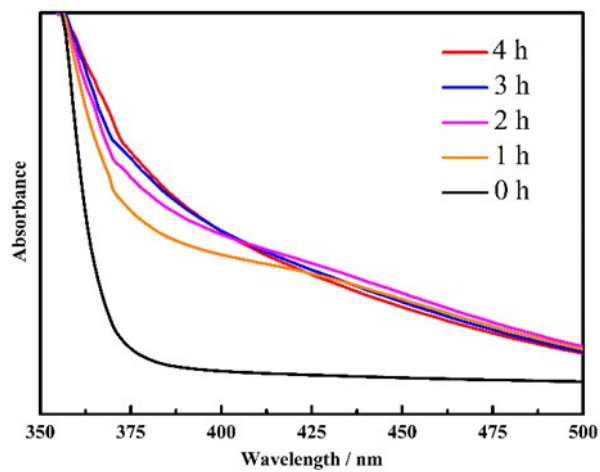

**Figure S1.** UV-vis absorption spectra of THS irradiated with LED@365 nm at different times.

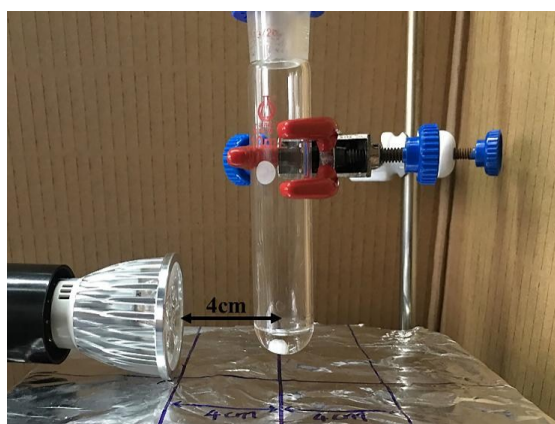

**Figure S2.** The picture of LED-light (365 nm, 5 x 1 w bulb, 480 mW/cm<sup>2</sup>).

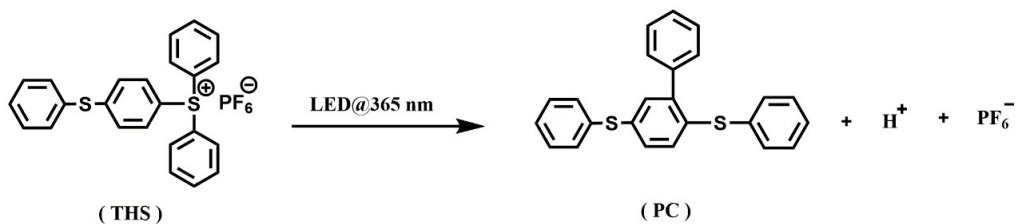

**Figure S3.** Under LED@365nm irradiation, molecular rearrangement of the triarylsulfonium moiety resulted in the generation of free  $\text{H}^+$ .<sup>1</sup>

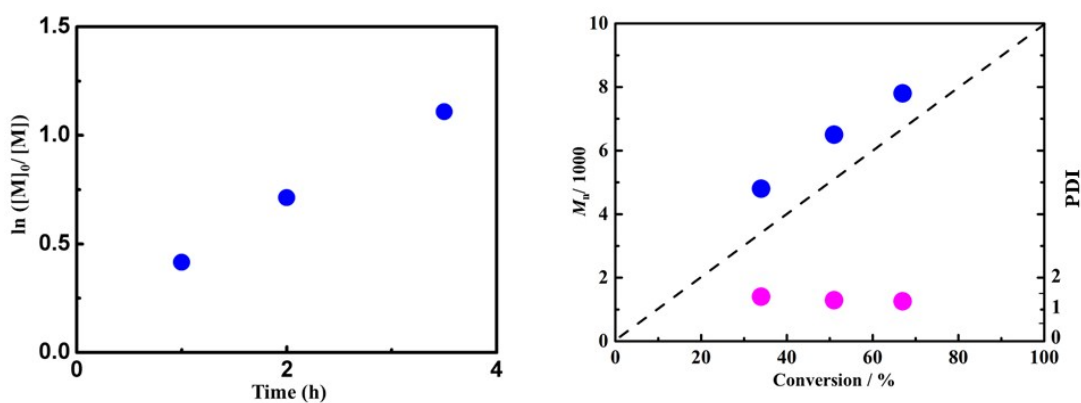

**Figure S4.** Plot of  $\ln ([M]_0 / [M])$  vs time. (b) The number-average molecular weight ( $M_{n, \text{GPC}}$ ) and polydispersity indices (PDI) versus monomer conversion. Polymerization conditions:  $[\text{MMA}] : [\text{EBiB}] : [\text{THS}] = 100 : 1 : 1$ , containing 0.25 g methyl methacrylate and 0.75 g solvent ( $V_{\text{DMAc}} : V_{\text{THF}} = 3 : 1$ ).

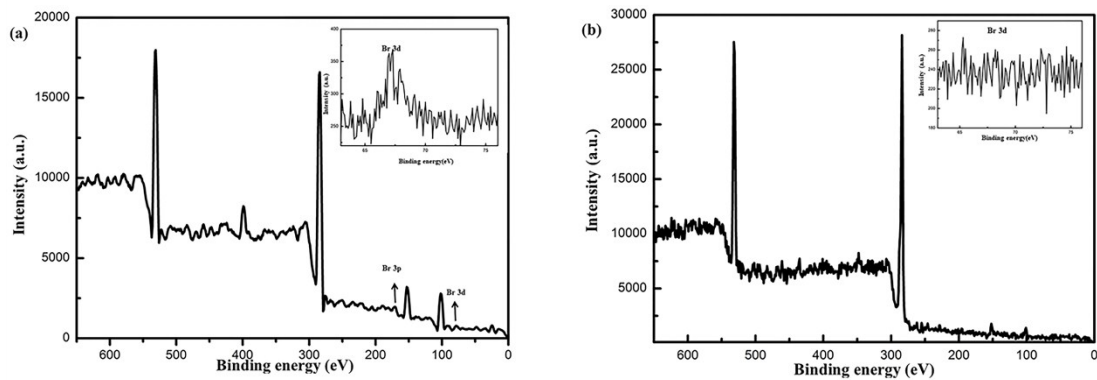

**Figure S5.** XPS analysis of Si-Br (a) and Si-PMMA-Br (b).

### References

1. A. Douvas, P. Argitis, K. Misiakos, D. Dimotikali, P. S. Petrou and S. E. Kakabakos, *Biosens. Bioelectron.*, 2002, **17**, 269-278.
